# Supplementary material for: Nonclonal Burkholderia pseudomallei Population in Melioidosis Case Cluster, Sri Lanka
Source: PubMed Central journal article supplement (PMC8545001; doi:10.3201/eid2711.210219), 2021-11
Supplement: 21-0219-Techapp-s1.pdf [file 21-0219-Techapp-s1.pdf]

# Nonclonal *Burkholderia pseudomallei* Population in Melioidosis Case Cluster, Sri Lanka

## Appendix

**Appendix Table.** Characteristics of melioidosis case-patients, eastern Sri Lanka\*

| Isolate | ST (clade)  | Age | Sex | Clinical presentation                                     | Underlying conditions | Area            | Outcome   |
|---------|-------------|-----|-----|-----------------------------------------------------------|-----------------------|-----------------|-----------|
| BPs110  | 1152 (BTFC) | 29  | M   | Subcutaneous abscess over chest                           | None                  | Kiran           | Recovered |
| BPs109  | 594 (BTFC)  | 61  | M   | Sepsis with pyelonephritis                                | Diabetes              | Kaluwanchikudy  | Died      |
| BPs112  | 1442 (YLF)  | 66  | M   | Acute febrile illness (focus of infection not identified) | Diabetes              | Kattankudy      | Recovered |
| BPs115  | 1413 (YLF)  | 43  | F   | Pneumonia with pleural effusion                           | Diabetes              | Periyaporathivu | Died      |
| BPs111  | 1364 (YLF)  | 33  | M   | Septic arthritis of elbow                                 | Diabetes              | Kiran           | Recovered |
| BPs114  | 594 (BTFC)  | 62  | F   | Sinusitis                                                 | Diabetes              | Kattankudy      | Recovered |
| BPs116  | 1179 (BTFC) | 20  | F   | Bronchopneumonia/septic arthritis                         | None                  | Kaluwanchikudy  | Died      |
| BPs,121 | 13 (YLF)    | 18  | M   | Acute febrile illness (focus of infection not identified) | None                  | Ambalanthurai   | Recovered |
| BPs122  | 594 (BTFC)  | 28  | F   | Bronchopneumonia/septic arthritis of knee                 | None                  | Bakkiella       | Died      |
| BPs133  | 594 (BTFC)  | 46  | M   | Sinusitis/thigh abscess                                   | Diabetes              | Kattankudy      | Recovered |

\*BPs, *Burkholderia pseudomallei*; BTFC, *B. thailandensis*-like flagellum and chemotaxis; YLF, *Yersinia*-like fimbrial.
